# Supplementary material
Source: PubMed Central journal article supplement (PMC2042165)

*wild-type*

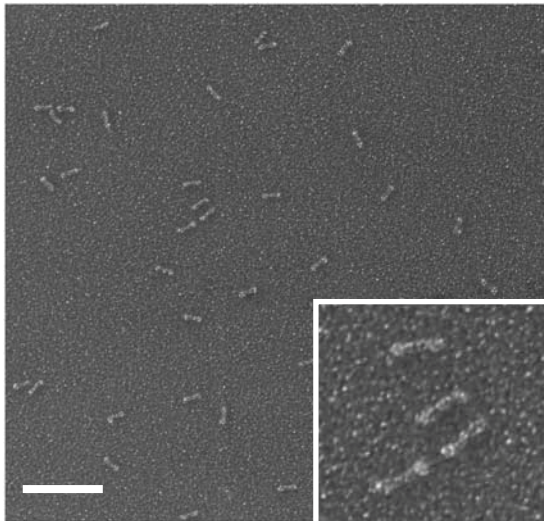

*K255E*-mutant

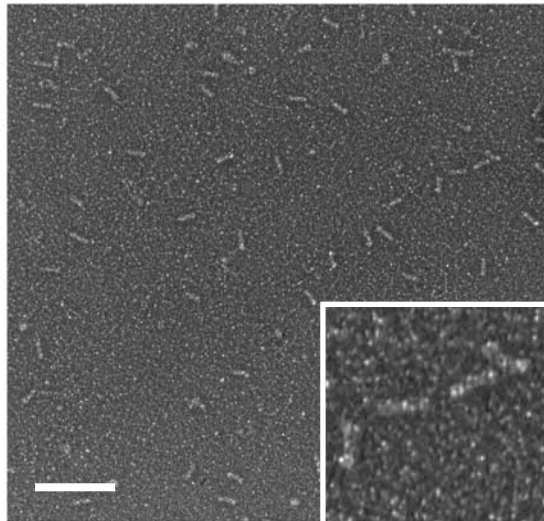

Supplement: pnas_0702451104_1.pdf [file pnas_0702451104_1.pdf]

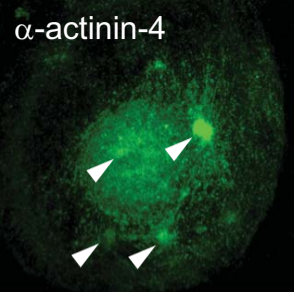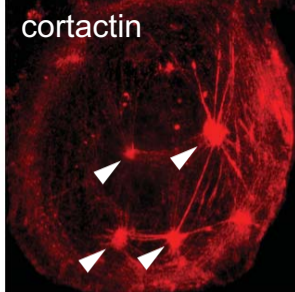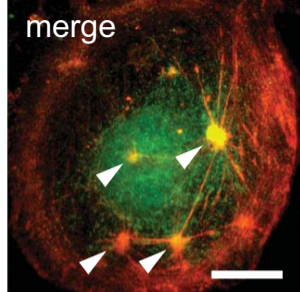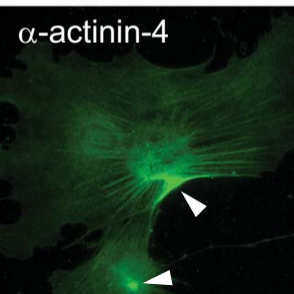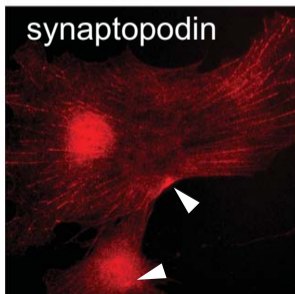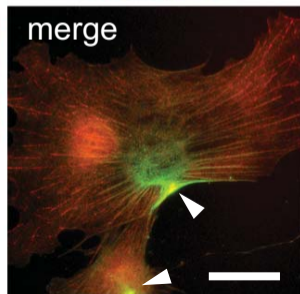

Supplement: pnas_0702451104_2.pdf [file pnas_0702451104_2.pdf]
